# Supplementary material for: Outcomes of Directional Branches of the T-Branch Off-the-Shelf Multi-Branched Stent-Graft
Source: MDPI journal article supplement (doi:10.3390/jcm11216513), 2022-11-02
Supplement: s1 [file s1]

Supplementary Figure S1. Freedom from target vessel instability. SE: standard error.

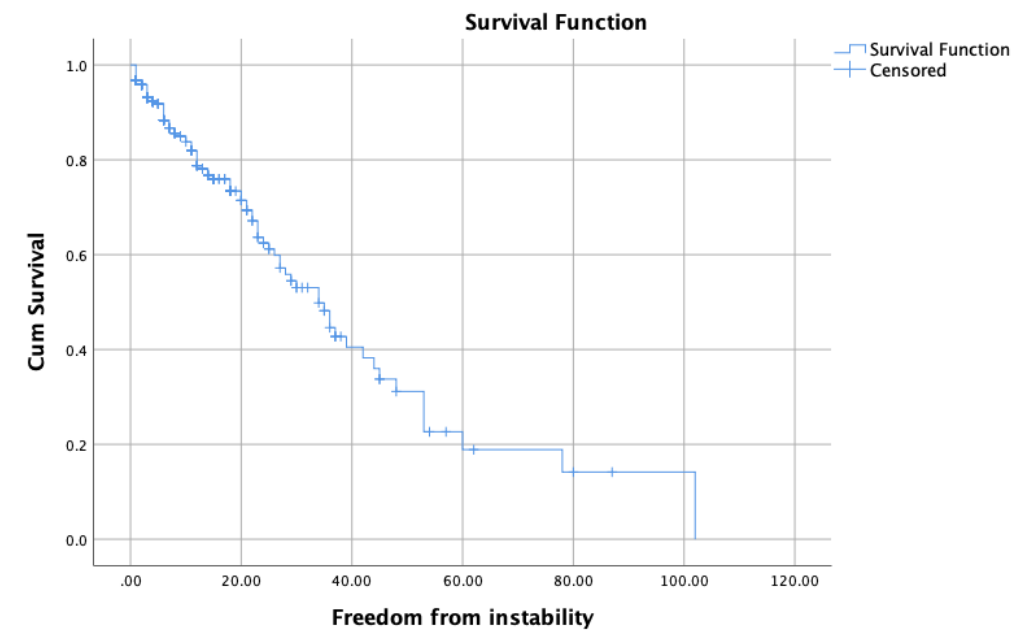

| Months           | 1     | 3   | 6     | 12  | 24  | 36  |
|------------------|-------|-----|-------|-----|-----|-----|
| Patients at risk | 508   | 274 | 180   | 124 | 52  | 25  |
| Events           | 17    | 28  | 38    | 54  | 71  | 83  |
| Percentages      | 96.8% | 93% | 88.4% | 79% | 62% | 45% |
| SE               | 0.8   | 1.3 | 1.9   | 2.8 | 4.3 | 5.4 |

Supplementary Figure S2. **(a)**. Sub-analysis between early and late experience for primary patency of coeliac trunk (CT) bridging covered stent. SE: standard error. **(b)**. Sub-analysis between early and late experience for primary patency of superior mesenteric artery (SMA) bridging covered stent. SE: standard error. **(c)**. Sub-analysis between early and late experience for primary patency of right renal artery (RRA) bridging covered stent. SE: standard error. **(d)**. Sub-analysis between early and late experience for primary patency of left renal artery (LRA) bridging covered stent. SE: standard error.

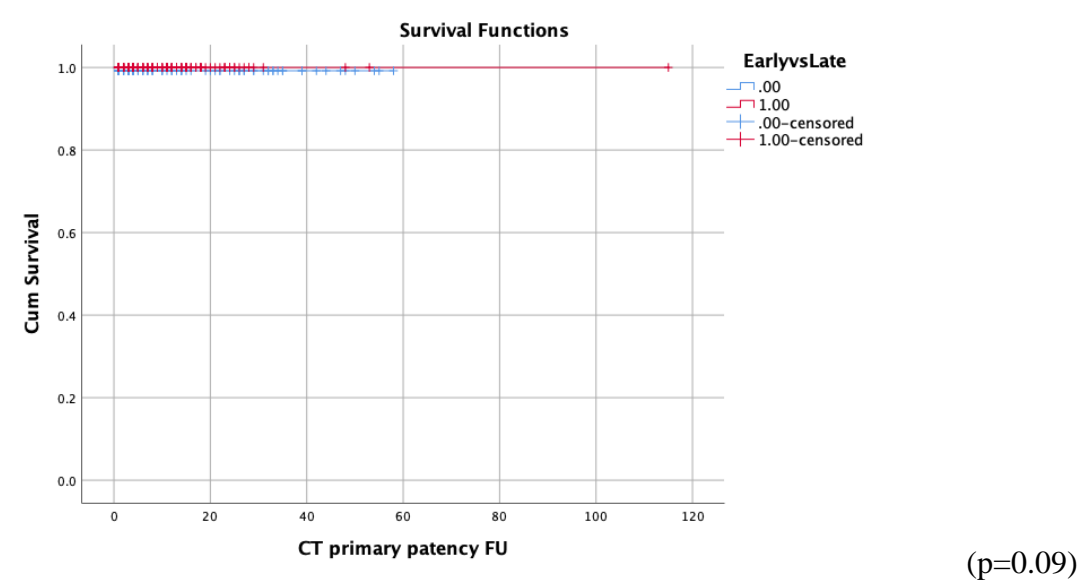

| Months                 | 1    | 3   | 6  | 12 | 24 | 36 |
|------------------------|------|-----|----|----|----|----|
| Patients at risk Early | 125  | 80  | 57 | 41 | 21 | 12 |
| Events                 | 1    | 1   | 1  | 1  | 1  | 1  |
| Percentages            | 99.2 |     |    |    |    |    |
| SE                     | 0.8  |     |    |    |    |    |
| Patients at risk Early | 341  | 170 | 97 | 58 | 13 | 3  |

| Events      | 0 | 0 | 0 | 0 | 0 | 0 |
|-------------|---|---|---|---|---|---|
| Percentages |   |   |   |   |   |   |
| SE          |   |   |   |   |   |   |

(a)

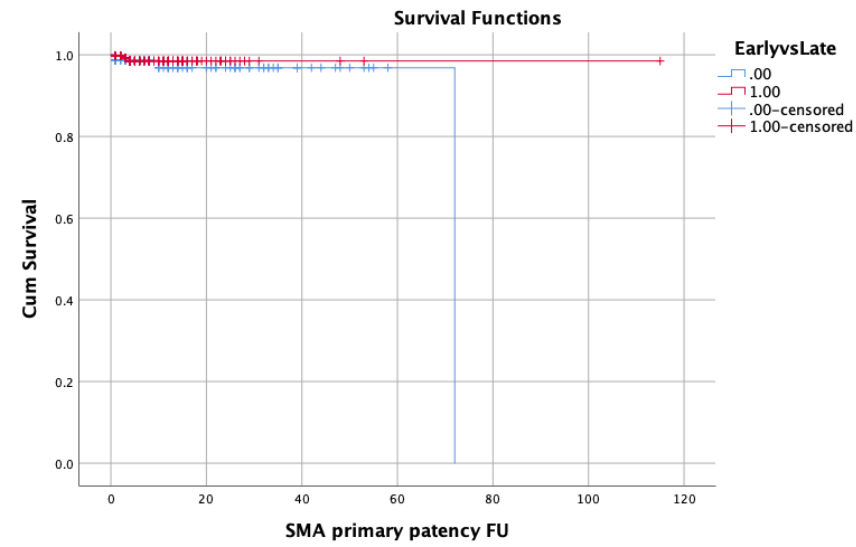

(p=0.21)

| Months                 | 1     | 3    | 6    | 12   | 24 | 36 |
|------------------------|-------|------|------|------|----|----|
| Patients at risk Early | 146   | 92   | 66   | 48   | 30 | 13 |
| Events                 | 2     | 2    | 2    | 3    | 3  | 3  |
| Percentages            | 98.6% |      |      | 96.8 |    |    |
| SE                     | 0.9   |      |      | 2    |    |    |
| Patients at risk Early | 368   | 186  | 104  | 62   |    |    |
| Events                 | 1     | 2    | 3    | 3    | 13 | 3  |
| Percentages            | 99.7  | 99.2 | 98.5 |      | 3  | 3  |
| SE                     | 0.3   | 0.6  | 0.9  |      |    |    |

(b)

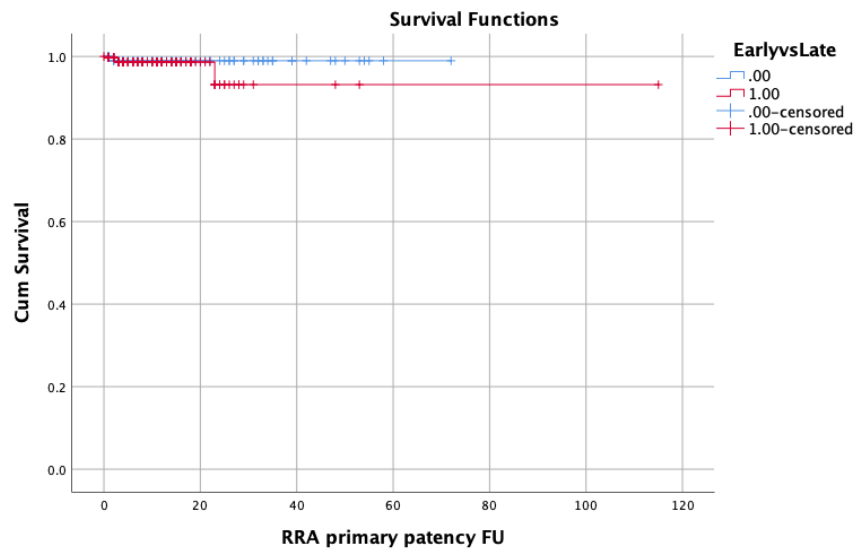

(p=0.39)

| Months                        | 1    | 3    | 6   | 12 | 24   | 36 |
|-------------------------------|------|------|-----|----|------|----|
| <b>Patients at risk Early</b> | 144  | 91   | 65  | 48 | 28   | 12 |
| <b>Events</b>                 | 0    | 1    | 1   | 1  | 1    | 1  |
| <b>Percentages</b>            |      | 99   |     |    |      |    |
| <b>SE</b>                     |      | 1    |     |    |      |    |
| <b>Patients at risk Early</b> | 372  | 183  | 103 | 61 | 12   |    |
| <b>Events</b>                 | 1    | 3    | 3   | 3  | 4    | 4  |
| <b>Percentages</b>            | 99.7 | 98.7 |     |    | 93.2 | 3  |
| <b>SE</b>                     | 0.3  | 0.8  |     |    | 5.4  |    |

(c)

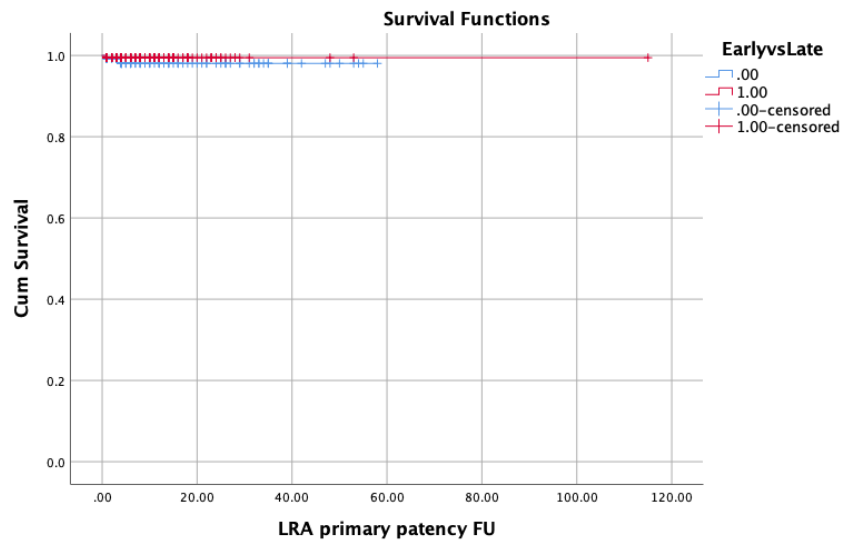

| Months                        | 1    | 3   | 6   | 12 | 24 | 36 |
|-------------------------------|------|-----|-----|----|----|----|
| <b>Patients at risk Early</b> | 146  | 92  | 64  | 47 | 27 | 11 |
| <b>Events</b>                 | 1    | 1   | 2   | 2  | 2  | 1  |
| <b>Percentages</b>            | 99.3 |     | 98  |    |    |    |
| <b>SE</b>                     | 0.7  |     | 1.4 |    |    |    |
| <b>Patients at risk Early</b> | 368  | 184 | 104 | 59 | 13 | 3  |
| <b>Events</b>                 | 2    | 2   | 2   | 2  | 2  | 2  |
| <b>Percentages</b>            | 99.5 |     |     |    |    |    |
| <b>SE</b>                     | 0.4  |     |     |    |    |    |

(d)
